# Supplementary material
Source: PubMed Central journal article supplement (PMC7158984)
Supplement: mmc1.pdf [file mmc1.pdf]

# THE LANCET Infectious Diseases

## Supplementary webappendix

This webappendix formed part of the original submission and has been peer reviewed. We post it as supplied by the authors.

Supplement to: Xu b, Kraemer MUG, on behalf of the Open COVID-19 Data Curation Group. Open access epidemiological data from the COVID-19 outbreak. *Lancet Infect Dis* 2020; published online Feb 19. [https://doi.org/10.1016/S1473-3099\(20\)30119-5](https://doi.org/10.1016/S1473-3099(20)30119-5).

Bo Xu<sup>1,2</sup>, Bernardo Gutierrez<sup>2</sup>, Sumiko Mekaru<sup>3,4</sup>, Kara Sewalk<sup>3</sup>, Alyssa Loskill<sup>3</sup>, Lin Wang<sup>5</sup>, Emily Cohn<sup>3</sup>, Sarah C. Hill<sup>2</sup>, Alexander Zabreski<sup>2</sup>, Sabrina Li<sup>6</sup>, Chieh-Hsi Wu<sup>7</sup>, Erin Hullah<sup>8</sup>, Julia Morgan<sup>8</sup>, Samuel V. Scarpino<sup>9</sup>, John S. Brownstein<sup>3,10</sup>, Oliver G. Pybus<sup>2</sup>, David M. Pigott<sup>8</sup>, Moritz U.G. Kraemer<sup>2,3,10</sup>

1. Tsinghua University, Beijing, China
2. Department of Zoology, University of Oxford, United Kingdom
3. Computational Epidemiology Group, Boston Children's Hospital, Boston, United States
4. Booz Allen Hamilton, Westborough Massachusetts, United States
5. Mathematical Modelling of Infectious Diseases Unit, Institut Pasteur, UMR2000, CNRS, Paris, France
6. Department of Geography and the Environment, University of Oxford, United Kingdom
7. Mathematical Sciences, University of Southampton, United Kingdom
8. Department of Health Metrics, University of Washington, Seattle, United States
9. Network Science Institute, Northeastern University, Boston, United States
10. Harvard Medical School, Boston, United States

Correspondence should be addressed to Moritz UG Kraemer ([moritz.kraemer@zoo.ox.ac.uk](mailto:moritz.kraemer@zoo.ox.ac.uk))
